# Supplementary material for: Fish oil in recent onset rheumatoid arthritis: a randomised, double-blind controlled trial within algorithm-based drug use
Source: HighWire-hosted journal article supplement (doi:10.1136/annrheumdis-2013-204145), 2013-10-01
Supplement: annrheumdis-2013-204145supp3.pdf [file annrheumdis-2013-204145supp3.pdf]

Methotrexate continuation or cessation.

|                                           | Control<br>n=53<br>no. of subjects (%) | Fish Oil<br>n=86<br>no. of subjects (%) |
|-------------------------------------------|----------------------------------------|-----------------------------------------|
| On MTX at 1 year                          | 36 (68)                                | 62 (72)                                 |
| Stopped temporarily for AE                | 7 (13)                                 | 11 (13)                                 |
| Not on MTX at 1 year                      | 17 (32)                                | 24 (28)                                 |
| Did not start MTX <sup>a</sup>            | 3 (6)                                  | 4 (5)                                   |
| Withdrew after starting MTX <sup>b</sup>  | 4 (8)                                  | 8 (9)                                   |
| Stopped MTX during the trial <sup>c</sup> | 10 (19)                                | 12 (14)                                 |

<sup>a</sup> Control: 2 withdrew, 1 completed 1 year; Fish Oil: 3 withdrew, 1 completed 1 year. Reasons for withdrawal are in Fig 2.

<sup>b</sup> Reasons for withdrawal are in Fig 2.

<sup>c</sup> Control: 9 due to adverse events, 1 due to pregnancy; Fish Oil: 11 due to adverse events, 1 due to anticipation of pregnancy
